1 An optimal 1H-MRS technique at 7T: Proof-of-principle  
2 in Chronic Multiple Sclerosis and Neuromyelitis Optica  
3 Brain Lesions and Normal Appearing Brain Tissue.

4  
5 George Tackley [1,2,\*,§], Yazhuo Kong [3,4,\*], Rachel Minne [5], Silvia Messina [7], Anderson  
6 Winkler[1,8], Ana Cavey [7], Rosie Everett [7], Gabriele C DeLuca [7], Andrew Weir [7], Matthew  
7 Craner [7], Irene Tracey [1], Jacqueline Palace [7], Charlotte J Stagg[1,9,\*\*] and Uzay Emir[1,5,6,\*\*]

8  
9 <sup>1</sup> Wellcome Centre for Integrative Neuroimaging, FMRIB, Nuffield Department of Clinical  
10 Neurosciences, University of Oxford, Oxford, OX3 9DU, UK

11 <sup>2</sup> Cardiff University Brain Research Imaging Centre (CUBRIC), Cardiff University, CF24 4HQ, UK

12 <sup>3</sup> CAS Key Laboratory of Behavioural Science, Institute of Psychology, Chinese Academy of Sciences,  
13 Beijing 100101, China

14 <sup>4</sup> Department of Psychology, University of Chinese Academy of Sciences, Beijing 100049, China

15 <sup>5</sup> School of Health Sciences, Purdue University, 550 Stadium Mall Drive, West Lafayette, IN 47907,  
16 (765) 494-1419, USA

17 <sup>6</sup> Weldon School of Biomedical Engineering, Purdue University, West Lafayette, IN, United States

18 <sup>7</sup> Division of Clinical Neurology, Nuffield Department of Clinical Neurosciences, University of Oxford,  
19 Oxford, OX3 9DU, UK

20 <sup>8</sup> National Institute of Mental Health (NIMH), National Institutes of Health (NIH), Bethesda, MD, USA

21 <sup>9</sup> MRC Brain Network Dynamics Unit, University of Oxford, Oxford, OX1 3TH, UK

22  
23 § To whom correspondence should be addressed:

24 Dr George Tackley, CUBRIC, Cardiff, Wales, [tackleyg@cardiff.ac.uk](mailto:tackleyg@cardiff.ac.uk)

25

26 \* Joint first authors

27 \*\* Joint last authors

28

## 29 Abstract

30 Magnetic Resonance Spectroscopy (MRS) allows for the non-invasive quantification of  
31 neurochemicals and has the potential to differentiate between the pathologically distinct diseases,  
32 multiple sclerosis (MS) and AQP4Ab-positive neuromyelitis optica spectrum disorder (AQP4Ab-  
33 NMOSD). In this study we characterised the metabolite profiles of brain lesions in 11 MS and 4  
34 AQP4Ab-NMOSD patients using an optimised MRS methodology at ultra-high field strength (7T)  
35 incorporating correction for T2 water relaxation differences between lesioned and normal tissue.

36

37 MS metabolite results were in keeping with the existing literature: total NAA was lower in lesions  
38 compared to normal appearing brain white matter (NAWM) with reciprocal findings for Inositol. An  
39 unexpected subtlety revealed by our technique was that total NAA differences were driven by NAA-  
40 glutamate (NAAG), a ubiquitous CNS molecule with functions quite distinct from NAA though  
41 commonly quantified together with NAA in MRS studies as total NAA. Surprisingly, AQP4Ab-NMOSD  
42 showed no significant differences for total NAA, NAA, NAAG or Inositol between lesion and NAWM  
43 sites, nor were there any differences between MS and AQP4Ab-NMOSD for *a priori* hypotheses.  
44 Post-hoc testing did however reveal greater total NAA in MS compared to AQP4Ab-NMOSD NAWM.  
45 Post-hoc testing also revealed a significant correlation between NAWM Ins:NAA and disability (as  
46 measured by EDSS) for disease groups combined, driven by the AP4Ab-NMOSD group.

47

48 Utilising an optimised MRS methodology, our study highlights some under-explored subtleties in  
49 MRS profiles, such as the absence of Inositol concentration differences in AQP4Ab-NMOSD brain  
50 lesions versus NAWM and the important influence of NAAG differences between lesions and normal  
51 appearing white matter in MS.

52

## 53 Abbreviations

- 54 Asc, ascorbate
- 55 Cr, creatine
- 56 GABA, gamma aminobutyric acid
- 57 Glc+Tau, glucose and taurine
- 58 Gln, glutamine
- 59 Glu, glutamate
- 60 Glx, Gln + Glu
- 61 GPC, glycerophosphocholine
- 62 GSH, glutathione
- 63 Ins / Inositol, *myo*-inositol
- 64 NAA, N-acetylaspartate (i.e. *not* including NAAG)
- 65 NAAG, N-acetylaspartylglutamate
- 66 PCr, phosphocreatine
- 67 PE, phosphorylethanolamine
- 68 Tau, taurine
- 69 tCho, total choline (GPC + Cho)
- 70 tCr, total creatine (Cr + PCr)
- 71 tNAA, total N-acetylaspartate (NAA + NAAG)
- 72
- 73
- 74
- 75

## 76 1. Introduction

77 Magnetic Resonance Spectroscopy (MRS) allows for the non-invasive quantification of  
78 neurochemicals, and therefore has the potential to differentiate between pathologically distinct  
79 diseases. This is perhaps especially important in circumstances where clinical syndromes may  
80 overlap but treatment strategies are distinct. In particular, there is interest in utilising MRS to  
81 differentiate the primary astrocytopathy Aquaporin-4 Antibody positive Neuromyelitis Optica  
82 Spectrum Disorders (AQP4Ab-NMOSD) (Fujihara, 2011) from the clinically similar but pathologically  
83 distinct disorder, Multiple Sclerosis (MS), which is believed to be a chronic inflammatory  
84 demyelinating disorder with secondary neurodegeneration (Lucchinetti et al., 2014; Wingerchuk et  
85 al., 2015). In addition, where MRS metrics prove sensitive to the underlying pathology in a disease  
86 state, they can inform our understanding of that pathology, and potentially be developed as  
87 biomarkers for future pharmacological studies.

88

89 MRS studies in MS consistently report a core pattern of findings. Compared to healthy control brain  
90 tissue, lesions of all ages show reduced total N-acetyl aspartate (tNAA) likely reflecting decreased  
91 neuronal mitochondrial activity, and raised Inositol-containing compounds (Ins), commonly taken to  
92 reflect glial activity (Brex et al., 2000; Ciccarelli et al., 2013; Miller et al., 2003). A similar pattern of  
93 changes is found in MS normal appearing white matter (NAWM) versus healthy controls, though to a  
94 smaller degree (De Stefano et al., 2007; Fernando et al., 2004; Helms et al., 2000; Miller et al., 2003).  
95 In addition to changes in specific metabolites, the relative concentrations of some MRS metabolites  
96 have also been correlated with clinical metrics. The relative concentration of Inositol and NAA  
97 (without NAAG) in NAWM (Ins:NAA), which provides an insight into the relative activity of glia and  
98 neurons within a given region, has been shown to predict disease progression in MS. It has been  
99 hypothesised to be a sensitive index that encapsulates both the damaging immune-mediated gliosis  
100 (increase in Inositol) and the disabling neurodegenerative axonal loss (reduction in NAA) that are

101 known features of MS pathology, and it has been shown to predict disease progression (Llufriu et al.,  
102 2014; Miller DH, 2014).

103

104 In patients with AQP4Ab-NMOSD, there is little or no evidence for a difference in either tNAA (i.e.  
105 NAA + NAAG) or Inositol in normal appearing white matter compared to controls (Aboul-Enein et al.,  
106 2010; Bichuetti et al., 2008; Kremer et al., 2015), raising the possibility that Inositol and tNAA may be  
107 sensitive discriminators between AQP4Ab-NMOSD and MS. However, no studies to date have  
108 studied MRS-quantified neurochemicals within AQP4Ab-NMOSD lesions in the brain. A single study  
109 has examined MRS-derived neurochemical profiles in AQP4Ab-NMOSD lesions within the spinal cord  
110 and demonstrated significantly lower Inositol in AQP4Ab-NMOSD lesions compared with both MS  
111 cord lesions and healthy controls (Ciccarelli et al., 2013), consistent with previously observed  
112 astrocyte damage and loss in AQP4Ab-NMOSD lesions. The authors also demonstrated, in line with  
113 existing literature, a substantial decrease in tNAA in MS lesions compared with healthy controls, but  
114 no significant difference in tNAA between AQP4Ab-NMOSD lesions and either MS lesions or controls.

115

116 Here, we wished to see whether MRS could distinguish between AQP4Ab-NMOSD and MS lesions in  
117 the brain. However, there are a number of technical difficulties in performing MRS in the context of  
118 neurological disease that are important to overcome in order to accurately address this question. In  
119 particular, lesioned tissue has a longer T2 than non-lesioned tissue, due to its increased water  
120 content (Zimmerman et al., 1986), which, if not compensated for (e.g. by using a short TE and T2\*  
121 measurement), will directly influence metabolite quantification. In addition, it is important to fully  
122 separate neurochemicals with highly similar spectral resonances but disparate physiological  
123 functions, for example NAA and the closely chemically related, but functionally distinct, NAA-  
124 glutamate (NAAG), often combined in the MRS metric tNAA. This is particularly important in the  
125 context of neurodegeneration, as NAA reflects neuronal mitochondrial function, whereas NAAG acts

126 as a neuromodulator (Baslow, 2000; Birken and Oldendorf, 1989; Neale et al., 2000). It is therefore  
127 difficult to clearly interpret changes in the tNAA metric in terms of the underlying pathology.

128

129 We therefore exploited recent advances in MRS methodology to study pathological differences  
130 between AQP4Ab-NMOSD and MS lesions. We used an ultra-high field (7T) scanner, to allow  
131 separation between NAA and NAAG, something not easily achievable at 3T, and modelled multiple  
132 water T2-relaxation times to compensate for lesion-related effects on metabolite quantification  
133 (Helms, 2001), approaches that have been little used in this context before now.

134

135 We wished to test the hypotheses that (1) Inositol would be higher in MS brain lesions than AQP4Ab-  
136 NMOSD brain lesions, reflecting the likely increased astrocytic damage in AQP4Ab-NMOSD  
137 compared to the reciprocal astrogliosis found in MS lesions, and (2) that NAA (tNAA, NAA & NAAG)  
138 would be higher in the normal appearing white matter in AQP4Ab-NMOSD patients compared with  
139 MS patients, in line with the relative lack of extra-lesional neurodegeneration in AQP4Ab-NMOSD  
140 (Matthews et al., 2015). Within diseases we also hypothesised that (3) NAA (tNAA, NAA & NAAG)  
141 would be greater in NAWM than lesion sites in line with expected neuronal loss in lesions, and that  
142 (4) inositol would be differentially *greater* in MS brain lesion versus NAWM sites and *lower* in  
143 AQP4Ab-NMOSD lesion versus NAWM sites reflecting the contrasting gliotic and astrocytopathic  
144 nature of lesions in these two conditions.

## 145 2. Methods

### 146 *2.1 Subjects*

147 Eleven patients with clinically diagnosed relapsing-remitting multiple sclerosis (RRMS) and four  
148 patients with AQP4Ab-NMOSD gave their written informed consent to participate in the study,  
149 under local ethics board approval (Oxfordshire REC A 10/H0604/99; Berkshire REC 13/SC/0238). In

150 addition to MR scanning, patients underwent a short clinical consultation and neurological  
151 examination including EDSS scoring. Current medications were recorded. Minimum lesion age was  
152 calculated as the time from the oldest clinical brain MRI to contain the targeted lesion.

## 153 *2.2 MR Acquisition*

154 MR was performed on a 7T Siemens MAGNETOM system (Siemens, Erlangen, Germany) equipped  
155 with a Nova Medical 32 channel receive array head coil. Two MRS volumes-of-interest (VOIs) were  
156 acquired per subject: one targeting a chronic, T2-hyperintense, T1-hypointense white matter lesion  
157 (>3 months old, confirmed on historical clinical MRIs) and another centred on a contralateral area of  
158 normal appearing white matter (NAWM; a majority white-matter voxel, avoiding as much grey  
159 matter and cerebrospinal fluid as possible), positioned as close as possible to contralateral  
160 reflection-symmetrical with the lesion voxel. The spectroscopy voxel volume was 15 x 15 x 15mm.

161

162 Spectroscopy voxels were manually positioned by reference to a 1mm isotropic T2-weighted fluid-  
163 attenuated inversion recovery (FLAIR) image (1mm isotropic, TR = 5s, TE = 272 ms, TI = 1.8 sec) (See  
164 Supplemental Figure 1 for individual voxel locations). First- and second-order shims were first  
165 adjusted by gradient-echo shimming (Shah et al., 2009). The second step involved only fine  
166 adjustment of first order shims using FASTMAP (Gruetter and Tkáč, 2000). Spectra were acquired  
167 using a Stimulated Echo Acquisition Mode (STEAM) pulse sequence (TE=11ms, TR=5s, number of  
168 transients=64) with variable power radiofrequency pulses with optimized relaxation delay (VAPOR),  
169 water suppression and outer volume saturation (Emir et al., 2012). Unsuppressed water spectra  
170 acquired from the same voxel were used to remove residual eddy current effects and to reconstruct  
171 the phased array spectra.

172

173 Finally, fully relaxed unsuppressed water signals were acquired at TEs ranging from 11 to 4000ms  
174 (TR=15s) to estimate the cerebrospinal fluid (CSF) contribution to each VOI (see below). A whole-

175 brain T1-MPRAGE (1mm isotropic, TR = 2.2s, TE = 282ms) was also acquired to evaluate T1 hypo-  
176 intensity in lesions.

## 177 *2.3 MRS Analysis*

178 Absolute metabolite concentrations were obtained relative to an unsuppressed water spectrum  
179 acquired from the same VOI. The transverse relaxation times (T2) of tissue water and percent CSF  
180 contribution to the VOI were obtained by fitting the integrals of the unsuppressed water spectra  
181 acquired in each VOI at different TE values with a biexponential fit (Piechnik et al., 2009), with the T2  
182 of CSF fixed at 640ms and three free parameters: T2 of tissue water, amplitude of tissue water, and  
183 amplitude of CSF water.

184

185 LCModel (Provencher, 2001) was used for spectral analysis and quantification. Single-subject  
186 metabolites were only retained if the Cramér-Rao lower bounds (CRLBs) estimated error of  
187 metabolite quantification was less than 20%, and average metabolites were only reported where at  
188 least 50% of single-subject measurements met this criterion.

189

190

## 191 *2.4 Statistics*

192 Cohort characteristics of age, disease duration, EDSS and minimum age of lesions were compared  
193 using unpaired t-tests; sex and ethnicity were compared using chi-square with Yate's correction.

194 Paired t-tests were used to compare mean T2-water estimates and measures of spectral quality. All  
195 subsequent group-level statistics were computed using permutation testing in FSL's PALM with  
196 10,000 permutations (Alberton et al., 2020; Jenkinson et al., 2012; Winkler et al., 2016). Unpaired  
197 two-sample t-tests were used to compare lesions and areas of NAWM across groups (hypotheses 1



198 and 2). One-sample t-tests were performed to test individual lesion and NAWM metabolite  
199 concentration differences within disease groups (hypotheses 2 and 3). We ran statistical tests for  
200 metabolite comparisons in three batches (the fewest number that data structure and test  
201 methodology would allow) to allow for family wise error rate correction. The three batches were:  
202 unpaired t-tests for MS and AQP4Ab-NMOSD comparisons, one-sample t-test for AQP4Ab-NMOSD  
203 lesion versus NAWM differences and one-sample t-tests for MS lesion versus NAWM differences. In  
204 order to test our directionally specific hypotheses, all *a priori* group-level t-tests were one-tailed.  
205 Post-hoc two-tailed t-tests, as detailed in the results, were also performed in FSL PALM.

206

207 Tests of correlation were limited to common associations described in the literature, namely  
208 disability's association with NAA:tCr (normal appearing brain tissue & lesions) (Khan et al., 2016;  
209 Mainero et al., 2001), Ins:NAA (normal appearing white and grey matter) (Llufriu et al., 2014; Miller  
210 DH, 2014) and GABA (normal appearing grey matter) (Cawley et al., 2015), and disease duration's  
211 association with Ins, NAA, Cr, tCr and tCho (normal appearing brain tissue) (Kirov et al., 2013).  
212 Correlations were evaluated visually and with R-square ( $R^2$ ), however due to low numbers of  
213 participants and the relatively large number of tests, p-values were not calculated except for post-  
214 hoc testing of Pearson's correlation coefficient in the case of ml:NAA vs EDSS (See supplemental  
215 figure 2). Pearson's correlations performed in R (R Core Team, 2017; Wickham, 2016).

### 216 3. Results

217 Patient characteristics are listed in Table 1. Three of the four AQP4Ab-NMOSD participants were  
218 Afro-Caribbean and one was Asian, in line with the non-Caucasian predominance in this disease. One  
219 MS participant was Afro-Caribbean, the remainder were Caucasian. All lesions studied were hyper-  
220 intense on the FLAIR image and hypo-intense on the T1 weighted image. The minimum age of the  
221 brain lesions ranged from 132 days to 9 years.

222

223

### 224 *3.1 MRS quality metrics*

225 We first wanted to ensure that there were no systematic differences in the quality of the LCModel fit  
226 between the NAWM and lesion VOIs. Reported CRLB estimates were generally low in all cases.  
227 However, in our MS sample Ala, Asc, Asp, Lac, PCho and Scyllo did not meet our CRLB criterion and  
228 were therefore excluded from further analysis. Likewise, for MS, 5 lesion and 5 NAWM measures  
229 were excluded from GABA analysis, 1 lesion and 4 NAWM measures from Gln, 1 lesion and 1 NAWM  
230 measure from Glc+Tau, 2 lesion and 1 NAWM measure from PE, and 1 NAWM measure from Tau.  
231 For AQP4Ab-NMOSD data, Ala, Asp, Lac, PCho and Scyllo did not meet the CRLB requirements and  
232 were excluded. Likewise, 1 lesion measure was excluded from GABA analysis and 2 lesion and 2  
233 NAWM measure from Asc. For the remaining metabolites we then wished to ensure that there was  
234 no significant difference in the quality of fit between NAWM and lesion groups. Statistical analyses  
235 demonstrated no differences, when tests were corrected for multiple comparisons (paired t-test p-  
236 values,  $\alpha = 0.05$ , Bonferroni threshold =  $0.05/19 = 0.0026$ :  $0.0025 < p < 0.05$ : AQP4Ab-NMOSD Gln  
237  $p=0.011$ , AQP4Ab-NMOSD Asc 0.015, MS Glu 0.049;  $p > 0.05$  for all other metabolites; see Table 3).

### 238 *3.2 T2 differences between lesions and normal-appearing*

#### 239 *tissue are relevant for metabolite quantification*

240 There was no difference between the LCModel estimated line-widths (Full Width Half Maximum,  
241 FWHM) and Signal-to-Noise ratios (S/N) of the spectra from the NAWM and lesioned tissue (table 2;  
242 S/N:  $25.7 \pm 5.6$  vs  $28.3 \pm 4$ ,  $p=0.10$ ; FWHM:  $0.03 \pm 0$  vs  $0.03 \pm 0$ ,  $p=0.96$ ). However, estimated T2-water  
243 relaxation time was higher in both MS and AQP4Ab-NMOSD lesion voxels than for NAWM voxels,  
244 reflecting the higher free-water content in this tissue ( $43.7 \pm 2.8$  vs  $39.9 \pm 2.6$ ,  $p=0.0001$ ). We

245 therefore went on to quantify neurochemicals in MS and AQP4Ab-NMOSD lesions and NAWM  
246 spectra using T2-corrected spectra.

247

248

### 249 *3.3 Differences in neurochemical profiles between NAWM and* 250 *lesions in MS*

251 Next, we investigated neurochemical differences between lesions and NAWM. All *a priori* group-  
252 level t-tests were unidirectional (one-tailed) in accordance with our hypotheses. In the MS group  
253 absolute tNAA was lower in lesions compared to NAWM ([NAWM tNAA] – [lesion tNAA]:  $1.21 \pm 1.31$   
254 (mean  $\pm$  SD); one-sample  $t(10)=2.91$ ,  $p=0.020$ ). Given that, as discussed above, tNAA is comprised of  
255 two metabolites with very different physiological roles, we therefore wanted to investigate whether  
256 this difference in tNAA was driven by a decrease in NAAG, or NAA, or both. NAAG was lower in  
257 lesions than in NAWM ([NAWM NAAG] – [lesion NAAG]:  $0.46 \pm 0.57$ ; one-sample  $t(10)=2.52$ ,  
258  $p=0.048$ ), but only a trend towards lower values in lesions was found for NAA ([NAWM NAA] –  
259 [lesion NAA]:  $0.75 \pm 1.13$ ; one-sample  $t(10)=2.10$ ,  $p=0.076$ ) (Figures 2 & 3 and Table 3A). Again,  
260 Inositol was greater in MS lesions than in NAWM ([lesions Ins] – [NAWM Ins]:  $0.82 \pm 0.99$ ;  $t(10)=2.62$ ;  
261  $p=0.036$ ; Figure 3 & Table 3A).

262

263

### 264 *3.4 No difference in neurochemical profiles between NAWM* 265 *and lesions in AQP4Ab-NMOSD*

266 Again with one-tailed t-tests of NAWM and lesion metabolite concentration differences, within the  
267 AQP4Ab-NMOSD patients, we found no difference in tNAA (note that this is  $n=4$ ; [NAWM tNAA]-

268 [lesion tNAA]:  $1.48 \pm 2.06$  (mean  $\pm$  sd); one-sample  $t(3)=1.24$ ,  $p=0.375$ ). When the two metabolites  
269 that contribute to tNAA were investigated separately, neither NAA nor NAAG differed between  
270 NAWM and lesions, despite NAAG being visibly greater in NAWM ([NAWM NAA]-[lesion NAA]:  $0.79$   
271  $\pm 1.84$ ; one-sample  $t(3)=0.74$ ,  $p=0.625$ ; [NAWM NAAG]-[lesion NAAG]:  $0.69 \pm 0.3$ ; one-sample  
272  $t(3)=3.96$ ,  $p=0.125$ ) (See Figure 3). Inositol did not differ between NAWM and lesioned tissue  
273 ([NAWM Ins] - [lesion Ins]:  $-0.63 \pm 0.78$ ; one-sample  $t(3)=-1.40$ ,  $p=1.000$ ) (see Figure 3 & Table 3B).  
274 There were thus no differences in either tNAA, NAA, NAAG or Inositol between the lesion and  
275 NAWM groups in AQP4Ab-NMOSD.

276

277

### 278 *3.5 Greater tNAA in NAWM in MS compared with AQP4Ab-* 279 *NMOSD*

280 We then wanted to compare neurochemical concentrations between MS and AQP4Ab-NMOSD.  
281 Unpaired one-tailed two-sample t-tests were used. NAWM concentrations of NAA, NAAG and tNAA  
282 were not lower in MS NAWM (AQP4Ab-NMOSD>MS NAWM NAA:  $8.69 \pm 0.7 > 9.69 \pm 0.9$ ; two-sample  
283  $t(13)=-1.7912$ ; AQP4Ab-NMOSD>MS NAWM NAAG:  $2.19 \pm 0.3 > 2.55 \pm 0.9$ ; two-sample  $t(13)=-0.7316$ ;  
284 AQP4Ab-NMOSD>MS NAWM tNAA:  $10.89 \pm 0.4 > 12.24 \pm 0.9$ ; two-sample  $t(13)=-2.7458$ ; all p-values  
285  $>1.000$ ). However, on visual inspection of the data, tNAA appeared to be greater in MS compared to  
286 AQP4Ab-NMOSD NAWM. A post-hoc two-tailed unpaired t-test (uncorrected for multiple  
287 comparisons) was significant (MS>AQP4Ab-NMOSD tNAA:  $12.24 \pm 0.9 > 10.89 \pm 0.4$ ;  $t(13)=2.75$ ,  
288  $p=0.0183$ ).  
289 Inositol was not greater in MS versus AQP4AB-NMOSD lesions (MS>AQP4Ab-NMOSD Ins:  $8.1 \pm 1.4 >$   
290  $7.86 \pm 1.3$ ; two-sample  $t(13)=0.268$ ,  $p=1.000$ ) (Figure 3).

291 For completeness, we tested for a significant interaction of site (NAWM / lesion) by group (MS /  
292 AQP4Ab-NMOSD) for NAA, NAAG, tNAA and Ins (including our *a priori* expectations regarding the  
293 direction of difference) and this was non-significant for all comparisons (all  $p > 0.9$ ).

### 294 ***3.6 Ins:NAA correlates with clinical score in AQP4Ab-NMOSD***

295 Finally, we wished to investigate whether there were any relationships between our metabolites of  
296 interest and disease scores (See supplemental figure 2). Of relationships previously reported in the  
297 literature, we demonstrated a striking linear correlation between NAWM Ins:NAA and EDSS for *both*  
298 MS and AQP4Ab-NMOSD (MS:  $R^2=0.22$ , AQP4Ab-NMOSD:  $R^2=0.91$ , respectively;  $R^2=0.30$  combined).  
299 Post-hoc tests, uncorrected for multiple comparisons, showed that this was significant for the  
300 pooled data (AQP4Ab-NMOSD + MS NAWM Ins:NAA  $\propto$  EDSS:  $r(13)=0.55$ ,  $p=0.033$ ) and for AQP4Ab-  
301 NMOSD alone (AQP4Ab-NMOSD NAWM Ins:NAA  $\propto$  EDSS;  $r(2)=0.95$ ;  $p=0.048$ ), but not for MS alone  
302 (MS NAWM Ins:NAA  $\propto$  EDSS:  $r(9)=0.47$ ,  $p=0.141$ ).

303 We additionally explored the relationship between Ins:NAA, disease group (MS / AQP4Ab-NMOSD)  
304 and MRS site (lesion / NAWM) with post-hoc two-tailed t-tests (uncorrected for multiple  
305 comparisons). We found that lesion Ins:NAA was significantly greater than NAWM Ins:NAA in MS  
306 (MS lesion Ins:NAA vs control Ins:NAA:  $0.76 \pm 0.12$  vs  $0.91 \pm 0.10$ ; one-sample  $t(10)=5.42$ ) but for all  
307 other comparisons was non-significant.

## 308 **4. Discussion**

309 This study was performed in order to investigate the patterns of neurochemical changes in lesioned  
310 tissue and in normal appearing white matter in multiple sclerosis (MS) and aquaporin-4 antibody  
311 positive neuromyelitis optica spectrum disorder (AQP4Ab-NMOSD). To do this, we acquired  
312 Magnetic Resonance Spectroscopy (MRS) data using an optimised sequence for seven tesla (7T) MRI.

313 We demonstrated significant differences in water T2 relaxation times between lesions and NAWM,  
314 which we corrected for in subsequent analyses.

315

316 Using this corrected data, as expected, Total NAA (tNAA) was lower in MS lesions compared to MS  
317 NAWM and Inositol was greater in MS lesions compared to MS NAWM, in line with historical MRS  
318 studies that attribute these features respectively to the axonal loss and gliosis seen in MS lesions  
319 (Arnold et al., 1992; Davie et al., 1994). We demonstrated no differences between lesion and  
320 NAWM in AQP4Ab-NMOSD patients, and no differences in either NAA or Inositol between MS and  
321 AQP4Ab-NMOSD lesions. We did show, however, a relationship between NAA:Ins, commonly  
322 thought to be a marker of neuronal loss and gliosis, and clinical disability score in both groups  
323 (Llufriu et al., 2014; Miller DH, 2014).

#### 324 *4.1 Optimised MRS allowed us to address important confounds*

325 A number of parameters were optimised to acquire our 7T MRS spectra. The STEAM sequence was  
326 chosen despite the loss of half of the available signal to minimize relaxation effects at a short echo  
327 time. Transverse relaxation differences between lesion sites and NAWM at longer TEs have the  
328 potential to confound the quantification of metabolite concentrations.

329

330 The achieved spectral quality (high spectral resolution, SNR, efficient water suppression, and a  
331 distortionless baseline) allowed reliable quantification of 17-18 metabolites in periventricular white  
332 matter (VOI = 15 x 15 x 15 ml) using LCModel analysis. T2-water relaxation times were significantly  
333 higher in lesioned tissue as confirmed in previous studies (Laule et al., 2007b, 2007a), and quantifies  
334 what one would expect given their features on T2-weighted images where lesions are identified  
335 clinically by their bright (hyperintense) appearance.

336

337 We avoided over-reliance on metabolite ratios (e.g. tNAA:tCr) and corrected for multiple T2-  
338 relaxation components. Both are of particular importance within neuroinflammatory conditions, the  
339 former because a parallel loss of tCr in damaged tissue may conceal tNAA loss when expressed as  
340 tNAA:tCr (Davies et al., 1995) and the latter because brain lesions often have a higher percentage of  
341 water compared to surrounding tissue. Accurate absolute quantification of metabolites, powerful in  
342 their own right, also allow for meaningful interpretation of metabolite ratios where applied.

#### 343 *4.2 Lower NAA-G in MS lesions than in NAWM*

344 A decrease in NAA in MS lesions has long been described (Arnold et al., 1992; Davie et al., 1994).  
345 However, a number of questions have remained to be conclusively answered about this finding,  
346 which we are able address here. Firstly, as discussed above, accounting for T2 relaxation times  
347 allows us to be sure that this is a true reflection of the underlying pathology and not an artefact of  
348 the acquisition protocols.

349

350 Secondly, our optimised MRS allowed us to accurately separate tNAA into its constituent parts: NAA  
351 and NAA-G. Although these two neurochemicals have similar molecular structures, meaning that  
352 they are hard to distinguish using MRS, they have distinct functional roles. The role of NAA is not  
353 entirely clear, but is a reflection of neuronal mitochondrial function, and has been hypothesised to  
354 have a role in myelination (Birken and Oldendorf, 1989; Moffett et al., 2007). NAAG, the most  
355 abundant peptide in the central nervous system, is found in both neurones and glia, acts as both a  
356 neurotransmitter and a glutamate reservoir, and is higher in white matter compared to grey matter  
357 (Chiew et al., 2018; Neale et al., 2000). NAAG in MS NAWM may reflect glial cell number and may  
358 also have a neuroprotective role via its ability to activate the metabotropic glutamate receptor,  
359 mGluR. As discussed above, it is possible that higher NAWM versus lesion tNAA is a reflection of *up-*  
360 *regulated* NAAG in NAWM as well as loss of NAAG (and NAA) in lesions and could be interpreted as a  
361 response to disease activity (Vrenken et al., 2005).

### 362 ***4.3 No differences in NAA or Inositol between lesions and*** 363 ***NAWM in AQP4Ab-NMOSD patients***

364 Within our four AQP4Ab-NMOSD patients, no differences were found between lesion and control  
365 sites for NAA, tNAA or Ins. Interpretation of these results is of course difficult given the small  
366 number of AQP4Ab-NMOSD patients in this study. However, to our knowledge there is only one  
367 other study describing AQP4Ab-NMOSD MRS findings in central nervous system lesions and that  
368 study focuses solely on the spinal cord (Cicarelli et al., 2013). Ciccarelli and colleagues found lower  
369 Inositol in AQP4Ab-NMOSD lesions relative to MS lesions which in turn had lower concentrations  
370 than healthy controls, and they hypothesised that this demonstrated astrocyte loss. There are no  
371 brain studies of AQP4Ab-NMOSD lesions versus NAWM for appropriate comparison and assumptions  
372 about AQP4Ab-NMOSD brain lesion metabolites from spinal cord data should be made with caution,  
373 especially given that no AQP4Ab-NMOSD control site was sampled in Ciccarelli's study and no  
374 healthy control group was sampled in ours. It must also be noted that both ours and Ciccarelli's  
375 studies have low numbers of AQP4Ab-NMOSD participants (4 and 5, respectively).

### 376 ***4.4 tNAA higher in NAWM in MS than AQP4Ab-NMOSD*** 377 ***patients***

378 There were no differences for *a priori* tests comparing AQP4Ab-NMOSD and MS lesion and control  
379 sites. However a post-hoc non-parametric t-test performed after unexpected differences were noted  
380 in plotted data revealed tNAA to be greater in MS compared to AQP4Ab-NMOSD NAWM, contrary to  
381 our hypothesis. Low tNAA in MS in contrast to AQP4Ab-NMOSD NAWM is usually offered as support  
382 for the hypothesis that MS pathogenesis involves a chronic extra-lesional neurodegenerative  
383 processes that is absent from AQP4Ab-NMOSD pathology (Huda et al., 2019). However, this finding  
384 has been challenged by Vrenken et al who found that the only significant difference between  
385 healthy controls and MS NAWM was a difference in NAAG (and not tNAA or NAA), and that NAAG  
386 wasn't *lower* in NAWM of MS patients but was instead *raised* compared to controls (Vrenken et al.,  
387 2005). This explanation better fits with our data and is supported by a recent study of healthy



388 participants, in whom absolute tNAA NAWM concentrations are lower than in MS NAWM here, and  
389 more in line with our AQP4Ab-NMOSD tNAA NAWM values (~8.7 mmol/L for 20-60 year olds) (Ding  
390 et al., 2016).

391

392 Contrary to our initial hypothesis, we did not find greater Inositol in MS lesions compared with  
393 AQP4Ab-NMOSD lesions. It is not clear why this might be, and interpreting a null result in an n of 4  
394 should be treated with caution, but it may be that this reflects the known pathology of some chronic  
395 AQP4Ab-NMOSD lesions where a period of gliosis supervenes over the astrocytic death of the acute  
396 lesion stage (Lucchinetti et al., 2014). MRS Inositol has been previously suggested as a potential  
397 differentiator for MS and AQP4Ab-NMOSD because astrocytes are reduced pathologically in  
398 AQP4Ab-NMOSD and increased in MS (Geraldes et al., 2018), but this assumption rests on data from  
399 the only study besides ours to have performed MRS in AQP4Ab-NMOSD lesions, and that study was  
400 in spinal cord lesions not brain lesions (Ciccarelli et al., 2013).

401

402 One explanation for the different Inositol concentrations between Ciccarelli's study and the results  
403 presented here is that we have studied lesions of different ages: our study examined older lesions  
404 more likely to be in the gliotic stage (4-24 months vs 43-116 months). It is also possible that spinal  
405 cord lesions are in general more destructive than brain lesions, leading to astrocyte loss, whereas  
406 brain lesions are commonly more subtle, non-demyelinating, non-necrosing and sometimes  
407 reversible (indeed, historically, brain lesions were thought to be atypical of AQP4Ab-  
408 NMOSD)(Lucchinetti et al., 2014; Pittock et al., 2006). Finally, AQP4Ab-NMOSD lesions in the cord  
409 are centred on grey matter, while those in the brain are found primarily white matter, which may be  
410 an important factor in gliosis (Lucchinetti et al., 2014).

#### 411 *4.5 Ins:NAA correlates with disability*

412 We also found a correlation between Ins:NAA and disability (as assessed by EDSS), which was  
413 significant on post-hoc testing for both disease groups combined and for AQP4Ab-NMOSD alone  
414 (Supplemental Figure 2). This correlation suggests that higher Ins:NAA relates to worse clinical  
415 score. Consistent with this finding, NAWM Ins:NAA has been shown in one study of MS patients to  
416 predict subsequent clinical disability, with higher Ins:NAA predicting greater EDSS score increase  
417 (Llufriu et al., 2014). It has been hypothesised that the CNS immune process in MS leads to an  
418 increase of inositol and the neurodegeneration causing long-term disability results in reduced NAA,  
419 hence Ins:NAA is greater in more destructive and longer-lasting disease (Llufriu et al., 2014; Miller  
420 DH, 2014). We found a similar association of Ins:NAA and EDSS across the whole group, but this was  
421 primarily driven by the strong relationship between Ins:NAA and EDSS in AQP4Ab-NMOSD NAWM  
422 (albeit in n=4). This is surprising, as the received wisdom is that AQP4Ab-NMOSD NAWM is relatively  
423 free from damage, at least outside the optic nerve and cortico-spinal tracts (Aboul-Enein et al., 2010;  
424 Bichueti et al., 2008; De Seze et al., 2010; Matthews et al., 2015). However, even if only small  
425 differences in NAWM NAA and Inositol occur, provided the differences decrease in magnitude with  
426 increasing EDSS, Ins:NAA will increase proportionally with EDSS. In our four AQP4Ab-NMOSD  
427 patients we found no-change or a slight increase in NAA with EDSS (i.e. no evidence of neuronal loss  
428 in NAWM in line with existing literature), along with a proportionally greater increase in Ins.

#### 429 *4.6 Limitations*

430 Our study sought to compare AQP4Ab-NMOSD and MS neurochemicals using MRS, but has some  
431 limitations. Firstly, no healthy control population was used as a comparator for NAWM brain voxels.  
432 Instead, patients' own NAWM was used as a control site to compare with lesion sites. As such, it is  
433 impossible to be sure whether the differences described above are driven by pathological increases  
434 or decrease or both, except through comparison with previously published values, which have  
435 invariably used different techniques and assessed different anatomical locations. It is thus possible

436 that a structured difference in sampling location by disease type has biased the findings, given that  
437 we know MRS measures differ slightly across different lobes of the brain (Ding et al., 2016). Further,  
438 there is MRS and MRI diffusion imaging evidence of mirror changes (tNAA:tCr and apparent diffusion  
439 coefficient, respectively) that occur contralaterally to sites of lesions in multiple sclerosis (Stefano et  
440 al., 1999; Werring et al., 2000). These could conceivably reduce the magnitude of lesion versus  
441 NAWM differences investigated here, or hide them altogether. Secondly, lesions were all at least 3  
442 months old (i.e. chronic) at the time of assessment. This makes our results comparable with most  
443 but not all previous MS MRS lesion studies but means little insight can be gained into changes with  
444 lesion progression. Finally, AQP4Ab-NMOSD disproportionately affects Afro-Caribbean individuals,  
445 whereas MS is commonly considered a disease of Caucasians. As such, matching ethnicity is difficult  
446 for studies comparing these two patient groups. It is not clear what effect, if any, this would have on  
447 the data.

## 448 5. Conclusion

449 Here we present results from an early, comprehensive metabolite profile of MS and AQP4Ab-  
450 NMOSD chronic lesions and normal appearing white matter acquired using magnetic resonance  
451 spectroscopy (MRS) at 7T. The study utilises an optimised methodology, including correction for  
452 multiple T2-water relaxation times, and our results are broadly in line with previous MRS studies in  
453 neurodegenerative conditions, but serve to highlight some under-explored subtleties in MRS profiles,  
454 such as the absence of Inositol concentration differences in AQP4Ab-NMOSD brain lesions versus  
455 NAWM and the important influence of NAAG differences between lesions and normal appearing  
456 white matter. We hope that the technique described here will be highly relevant for future 7T MRS  
457 studies of this sort.

## 458 Acknowledgements

459 This work was funded by the MS Society (grant number 858/07) and the Guthy Jackson Charitable  
460 Foundation. The research was additionally supported by the National Institute for Health Research  
461 (NIHR) Oxford Biomedical Research Centre, and the NIHR Oxford Health Biomedical Research  
462 Centre. The Wellcome Centre for Integrative Neuroimaging is supported by core funding from the  
463 Wellcome Trust (203139/Z/16/Z). GT holds an Institutional Strategic Support Fund (ISSF) Fellowship  
464 funded by the Wellcome trust and received funding from the Economic and Social Research Council's  
465 (ESRC's) postdoctoral fellowship programme prior to the current post. CJS holds a Sir Henry Dale  
466 Fellowship, funded by the Wellcome Trust and the Royal Society (102584/Z/13/Z).

## 467 Data Statement

468 Due the clinically sensitive nature of the data it is have not been made freely available. However,  
469 should you or your organisation have an interest in acquiring this data for the purpose of furthering  
470 the understanding of multiple sclerosis and neuromyelitis optica, please get in touch with the  
471 corresponding author.

472

## 473 Declaration of Interest

474 GT reported no declarations of interest.

475 YK reported no declarations of interest.

476 RM reported no declarations of interest.

477 SM reported receiving travel grants from Biogen, Novartis, Bayer, Merck & Co, Roche, and Almirall  
478 and honorarium from Biogen for advisory work.

479 AW reported no declarations of interest.

480 AC reported no declarations of interest.

481 RE reported no declarations of interest.

482 GDL is supported by the NIHR Biomedical Research Centre (BRC), Oxford and has research funding  
483 from the Oxford BRC, MRC(UK), UK MS Society, and National Health and Medical Research  
484 (Australia). GD has received travel expenses from Bayer Schering, Biogen Idec, Genzyme, Merck  
485 Serono, Novartis, American Academy of Neurology, and MS Academy, and honoraria as an invited  
486 speaker for Novartis, American Academy of Neurology, and MS Academy.  
487 AW reported no declarations of interest.  
488 MC reported no declarations of interest.  
489 IT reported no declarations of interest.  
490 JP reported no declarations of interest.  
491 CS reported no declarations of interest.  
492 UE reported no declarations of interest.

493

## 494 References

- 495 Aboul-Enein, F., Krššák, M., Höftberger, R., Prayer, D., Kristoferitsch, W., 2010. Diffuse White Matter  
496 Damage Is Absent in Neuromyelitis Optica. *Am. J. Neuroradiol.* 31, 76–79.  
497 <https://doi.org/10.3174/ajnr.A1791>
- 498 Alberton, B.A.V., Nichols, T.E., Gamba, H.R., Winkler, A.M., 2020. Multiple testing correction over  
499 contrasts for brain imaging. *NeuroImage* 216, 116760.  
500 <https://doi.org/10.1016/j.neuroimage.2020.116760>
- 501 Arnold, D.L., Matthews, P.M., Francis, G.S., O'Connor, J., Antel, J.P., 1992. Proton magnetic  
502 resonance spectroscopic imaging for metabolic characterization of demyelinating plaques.  
503 *Ann. Neurol.* 31, 235–241. <https://doi.org/10.1002/ana.410310302>
- 504 Baslow, M.H., 2000. Functions of N-Acetyl-L-Aspartate and N-Acetyl-L-Aspartylglutamate in the  
505 Vertebrate Brain. *J. Neurochem.* 75, 453–459. <https://doi.org/10.1046/j.1471-4159.2000.0750453.x>
- 507 Bichuetti, D.B., Rivero, R.L.M., Oliveira, E.M.L., Oliveira, D.M., Amorin de Souza, N., Nogueira, R.G.,  
508 Abdala, N., Gabbai, A., 2008. White matter spectroscopy in neuromyelitis optica: A case  
509 control study. *J. Neurol.* 255, 1895–1899. <https://doi.org/10.1007/s00415-009-0940-0>
- 510 Birken, D.L., Oldendorf, W.H., 1989. N-Acetyl-L-Aspartic acid: A literature review of a compound  
511 prominent in 1H-NMR spectroscopic studies of brain. *Neurosci. Biobehav. Rev.* 13, 23–31.  
512 [https://doi.org/10.1016/S0149-7634\(89\)80048-X](https://doi.org/10.1016/S0149-7634(89)80048-X)
- 513 Brex, P., Parker, G., Leary, S., Molyneux, P., Barker, G., Davie, C., Thompson, A., Miller, D., 2000.  
514 Lesion heterogeneity in multiple sclerosis: a study of the relations between appearances on  
515 T1 weighted images, T1 relaxation times, and metabolite concentrations. *J. Neurol.*  
516 *Neurosurg. Psychiatry* 68, 627–632. <https://doi.org/10.1136/jnnp.68.5.627>

- 517 Cawley, N., Solanky, B.S., Muhlert, N., Tur, C., Edden, R.A.E., Wheeler-Kingshott, C.A.M., Miller, D.H.,  
518 Thompson, A.J., Ciccarelli, O., 2015. Reduced gamma-aminobutyric acid concentration is  
519 associated with physical disability in progressive multiple sclerosis. *Brain J. Neurol.* 138,  
520 2584–2595. <https://doi.org/10.1093/brain/awv209>
- 521 Chiew, M., Jiang, W., Burns, B., Larson, P., Steel, A., Jezzard, P., Thomas, M.A., Emir, U.E., 2018.  
522 Density-weighted concentric rings k-space trajectory for 1H magnetic resonance  
523 spectroscopic imaging at 7 T. *NMR Biomed.* 31, e3838. <https://doi.org/10.1002/nbm.3838>
- 524 Ciccarelli, O., Thomas, D.L., De Vita, E., Wheeler-Kingshott, C.A.M., Kachramanoglou, C., Kapoor, R.,  
525 Leary, S., Matthews, L., Palace, J., Chard, D., Miller, D.H., Toosy, A.T., Thompson, A.J., 2013.  
526 Low Myo-inositol indicating astrocytic damage in a case series of neuromyelitis optica:  
527 Astrocytic Damage in NMO. *Ann. Neurol.* n/a-n/a. <https://doi.org/10.1002/ana.23909>
- 528 Davie, C.A., Hawkins, C.P., Barker, G.J., Brennan, A., Tofts, P.S., Miller, D.H., McDonald, W.I., 1994.  
529 Serial proton magnetic resonance spectroscopy in acute multiple sclerosis lesions. *Brain* 117,  
530 49–58. <https://doi.org/10.1093/brain/117.1.49>
- 531 Davies, S.E., Newcombe, J., Williams, S.R., McDonald, W.I., Clark, J.B., 1995. High resolution proton  
532 NMR spectroscopy of multiple sclerosis lesions. *J. Neurochem.* 64, 742–748.
- 533 De Seze, J., Blanc, F., Kremer, S., Collongues, N., Fleury, M., Marcel, C., Namer, I.-J., 2010. Magnetic  
534 resonance spectroscopy evaluation in patients with neuromyelitis optica. *J. Neurol.*  
535 *Neurosurg. Psychiatry* 81, 409–411. <https://doi.org/10.1136/jnnp.2008.168070>
- 536 De Stefano, N., Filippi, M., Miller, D., Pouwels, P.J., Rovira, A., Gass, A., Enzinger, C., Matthews, P.M.,  
537 Arnold, D.L., 2007. Guidelines for using proton MR spectroscopy in multicenter clinical MS  
538 studies. *Neurology* 69, 1942–1952. <https://doi.org/10.1212/01.wnl.0000291557.62706.d3>
- 539 Ding, X.-Q., Maudsley, A.A., Sabati, M., Sheriff, S., Schmitz, B., Schütze, M., Bronzlik, P., Kahl, K.G.,  
540 Lanfermann, H., 2016. Physiological neuronal decline in healthy aging human brain — An in  
541 vivo study with MRI and short echo-time whole-brain 1H MR spectroscopic imaging.  
542 *NeuroImage* 137, 45–51. <https://doi.org/10.1016/j.neuroimage.2016.05.014>
- 543 Emir, U.E., Auerbach, E.J., Moortele, P.-F.V.D., Marjańska, M., Uğurbil, K., Terpstra, M., Tkáč, I., Öz,  
544 G., 2012. Regional neurochemical profiles in the human brain measured by 1H MRS at 7 T  
545 using local B1 shimming. *NMR Biomed.* 25, 152–160. <https://doi.org/10.1002/nbm.1727>
- 546 Fernando, K.T.M., McLean, M.A., Chard, D.T., MacManus, D.G., Dalton, C.M., Miskiel, K.A., Gordon,  
547 R.M., Plant, G.T., Thompson, A.J., Miller, D.H., 2004. Elevated white matter myo-inositol in  
548 clinically isolated syndromes suggestive of multiple sclerosis. *Brain* 127, 1361–1369.  
549 <https://doi.org/10.1093/brain/awh153>
- 550 Fujihara, K., 2011. Neuromyelitis optica and astrocytic damage in its pathogenesis. *J. Neurol. Sci.*,  
551 Special Section: ECF 2009 306, 183–187. <https://doi.org/10.1016/j.jns.2011.02.018>
- 552 Gheraldes, R., Ciccarelli, O., Barkhof, F., De Stefano, N., Enzinger, C., Filippi, M., Hofer, M., Paul, F.,  
553 Preziosa, P., Rovira, A., DeLuca, G.C., Kappos, L., Yousry, T., Fazekas, F., Frederiksen, J.,  
554 Gasperini, C., Sastre-Garriga, J., Evangelou, N., Palace, J., on behalf of the MAGNIMS study  
555 Group, 2018. The current role of MRI in differentiating multiple sclerosis from its imaging  
556 mimics. *Nat. Rev. Neurol.* 14, 199–213. <https://doi.org/10.1038/nrneurol.2018.14>
- 557 Gruetter, R., Tkáč, I., 2000. Field mapping without reference scan using asymmetric echo-planar  
558 techniques. *Magn. Reson. Med.* 43, 319–323. [https://doi.org/10.1002/\(SICI\)1522-  
559 2594\(200002\)43:2<319::AID-MRM22>3.0.CO;2-1](https://doi.org/10.1002/(SICI)1522-2594(200002)43:2<319::AID-MRM22>3.0.CO;2-1)
- 560 Helms, G., 2001. Volume correction for edema in single-volume proton MR spectroscopy of contrast-  
561 enhancing multiple sclerosis lesions. *Magn. Reson. Med.* 46, 256–263.  
562 <https://doi.org/10.1002/mrm.1186>
- 563 Helms, G., Stawiarz, L., Kivisäkk, P., Link, H., 2000. Regression analysis of metabolite concentrations  
564 estimated from localized proton MR spectra of active and chronic multiple sclerosis lesions.  
565 *Magn. Reson. Med.* 43, 102–110. [https://doi.org/10.1002/\(SICI\)1522-  
566 2594\(200001\)43:1<102::AID-MRM12>3.0.CO;2-I](https://doi.org/10.1002/(SICI)1522-2594(200001)43:1<102::AID-MRM12>3.0.CO;2-I)

- 567 Huda, S., Whittam, D., Bhojak, M., Chamberlain, J., Noonan, C., Jacob, A., Kneen, R., 2019.  
568 Neuromyelitis optica spectrum disorders. *Clin. Med.* 19, 169–176.  
569 <https://doi.org/10.7861/clinmedicine.19-2-169>
- 570 Jenkinson, M., Beckmann, C.F., Behrens, T.E.J., Woolrich, M.W., Smith, S.M., 2012. FSL. *NeuroImage*  
571 62, 782–790. <https://doi.org/10.1016/j.neuroimage.2011.09.015>
- 572 Khan, O., Seraji-Bozorgzad, N., Bao, F., Razmjou, S., Caon, C., Santiago, C., Latif, Z., Aronov, R., Zak, I.,  
573 Ashtamker, N., Kolodny, S., Ford, C., Sidi, Y., 2016. The Relationship Between Brain MR  
574 Spectroscopy and Disability in Multiple Sclerosis: 20-Year Data from the U.S. Glatiramer  
575 Acetate Extension Study. *J. Neuroimaging n/a-n/a*. <https://doi.org/10.1111/jon.12358>
- 576 Kirov, I.I., Tal, A., Babb, J.S., Herbert, J., Gonen, O., 2013. Serial proton MR spectroscopy of gray and  
577 white matter in relapsing-remitting MS. *Neurology* 80, 39–46.  
578 <https://doi.org/10.1212/WNL.0b013e31827b1a8c>
- 579 Kremer, S., Renard, F., Achard, S., Lana-Peixoto, M.A., Palace, J., Asgari, N., Klawiter, E.C.,  
580 Tenenbaum, S.N., Banwell, B., Greenberg, B.M., Bennett, J.L., Levy, M., Villoslada, P., Saiz,  
581 A., Fujihara, K., Chan, K.H., Schippling, S., Paul, F., Kim, H.J., de Seze, J., Wuerfel, J.T., Guthy-  
582 Jackson Charitable Foundation (GJCF) Neuromyelitis Optica (NMO) International Clinical  
583 Consortium and Biorepository, Cabre, P., Marignier, R., Tedder, T., van Pelt, D., Broadley, S.,  
584 Chitnis, T., Wingerchuk, D., Pandit, L., Leite, M.I., Apiwattanakul, M., Kleiter, I.,  
585 Prayoonwiwat, N., Han, M., Hellwig, K., van Herle, K., John, G., Hooper, D.C., Nakashima, I.,  
586 Sato, D., Yeaman, M.R., Waubant, E., Zamvil, S., Stüve, O., Aktas, O., Smith, T.J., Jacob, A.,  
587 O'Connor, K., 2015. Use of Advanced Magnetic Resonance Imaging Techniques in  
588 Neuromyelitis Optica Spectrum Disorder. *JAMA Neurol.* 72, 815–822.  
589 <https://doi.org/10.1001/jamaneurol.2015.0248>
- 590 Laule, C., Vavasour, I.M., Kolind, S.H., Traboulsee, A.L., Moore, G.R.W., Li, D.K.B., MacKay, A.L.,  
591 2007a. Long T2 water in multiple sclerosis: What else can we learn from multi-echo T2  
592 relaxation? *J. Neurol.* 254, 1579–1587. <https://doi.org/10.1007/s00415-007-0595-7>
- 593 Laule, C., Vavasour, I.M., Mädler, B., Kolind, S.H., Sirrs, S.M., Brief, E.E., Traboulsee, A.L., Moore,  
594 G.R.W., Li, D.K.B., MacKay, A.L., 2007b. MR evidence of long T2 water in pathological white  
595 matter. *J. Magn. Reson. Imaging* 26, 1117–1121. <https://doi.org/10.1002/jmri.21132>
- 596 Llufriu, S., Kornak, J., Ratiney, H., Oh, J., Brenneman, D., Cree, B.A., Sampat, M., Hauser, S.L., Nelson,  
597 S.J., Pelletier, D., 2014. Magnetic resonance spectroscopy markers of disease progression in  
598 multiple sclerosis. *JAMA Neurol.* 71, 840–847. <https://doi.org/10.1001/jamaneurol.2014.895>
- 599 Lucchinetti, C.F., Guo, Y., Popescu, B.F.Gh., Fujihara, K., Itoyama, Y., Misu, T., 2014. The Pathology of  
600 an Autoimmune Astrocytopathy: Lessons Learned from Neuromyelitis Optica. *Brain Pathol.*  
601 *Zurich Switz.* 24, 83–97. <https://doi.org/10.1111/bpa.12099>
- 602 Mainero, C., De Stefano, N., Iannucci, G., Sormani, M.P., Guidi, L., Federico, A., Bartolozzi, M.L.,  
603 Comi, G., Filippi, M., 2001. Correlates of MS disability assessed in vivo using aggregates of  
604 MR quantities. *Neurology* 56, 1331–1334. <https://doi.org/10.1212/WNL.56.10.1331>
- 605 Matthews, L., Kolind, S., Brazier, A., Leite, M.I., Brooks, J., Traboulsee, A., Jenkinson, M., Johansen-  
606 Berg, H., Palace, J., 2015. Imaging Surrogates of Disease Activity in Neuromyelitis Optica  
607 Allow Distinction from Multiple Sclerosis. *PLOS ONE* 10, e0137715.  
608 <https://doi.org/10.1371/journal.pone.0137715>
- 609 Miller DH, 2014. Magnetic resonance spectroscopy: A possible in vivo marker of disease progression  
610 for multiple sclerosis? *JAMA Neurol.* 71, 828–830.  
611 <https://doi.org/10.1001/jamaneurol.2014.896>
- 612 Miller, D.H., Thompson, A.J., Filippi, M., 2003. Magnetic resonance studies of abnormalities in the  
613 normal appearing white matter and grey matter in multiple sclerosis. *J. Neurol.* 250, 1407–  
614 1419. <https://doi.org/10.1007/s00415-003-0243-9>
- 615 Moffett, J.R., Ross, B., Arun, P., Madhavarao, C.N., Namboodiri, A.M.A., 2007. N-Acetylaspartate in  
616 the CNS: From neurodiagnostics to neurobiology. *Prog. Neurobiol.* 81, 89–131.  
617 <https://doi.org/10.1016/j.pneurobio.2006.12.003>

- 618 Neale, J.H., Bzdega, T., Wroblewska, B., 2000. N-Acetylaspartylglutamate: The Most Abundant  
619 Peptide Neurotransmitter in the Mammalian Central Nervous System. *J. Neurochem.* 75,  
620 443–452. <https://doi.org/10.1046/j.1471-4159.2000.0750443.x>
- 621 Piechnik, S.K., Evans, J., Bary, L.H., Wise, R.G., Jezzard, P., 2009. Functional changes in CSF volume  
622 estimated using measurement of water T2 relaxation. *Magn. Reson. Med.* 61, 579–586.  
623 <https://doi.org/10.1002/mrm.21897>
- 624 Pittock, S.J., Lennon, V.A., Krecke, K., Wingerchuk, D.M., Lucchinetti, C.F., Weinshenker, B.G., 2006.  
625 Brain Abnormalities in Neuromyelitis Optica. *Arch. Neurol.* 63, 390–396.  
626 <https://doi.org/10.1001/archneur.63.3.390>
- 627 Provencher, S.W., 2001. Automatic quantitation of localized in vivo <sup>1</sup>H spectra with LCModel. *NMR*  
628 *Biomed.* 14, 260–264.
- 629 R Core Team, 2017. R: A Language and Environment for Statistical Computing. R Foundation for  
630 Statistical Computing, Vienna, Austria.
- 631 Shah, S., Kellman, P., Greiser, A., Weale, P., Zuehlsdorff, S., Jerecic, R., 2009. Rapid Fieldmap  
632 Estimation for Cardiac Shimming. *Proc. Intl. Soc. Mag. Reson. Med.* 566.
- 633 Stefano, N.D., Narayanan, S., Matthews, P.M., Francis, G.S., Antel, J.P., Arnold, D.L., 1999. In vivo  
634 evidence for axonal dysfunction remote from focal cerebral demyelination of the type seen  
635 in multiple sclerosis. *Brain* 122, 1933–1939. <https://doi.org/10.1093/brain/122.10.1933>
- 636 Vrenken, H., Barkhof, F., Uitdehaag, B. m. j., Castelijns, J. a., Polman, C. h., Pouwels, P. j. w., 2005.  
637 MR spectroscopic evidence for glial increase but not for neuro-axonal damage in MS normal-  
638 appearing white matter. *Magn. Reson. Med.* 53, 256–266.  
639 <https://doi.org/10.1002/mrm.20366>
- 640 Werring, D.J., Brassat, D., Droogan, A.G., Clark, C.A., Symms, M.R., Barker, G.J., MacManus, D.G.,  
641 Thompson, A.J., Miller, D.H., 2000. The pathogenesis of lesions and normal-appearing white  
642 matter changes in multiple sclerosisA serial diffusion MRI study. *Brain* 123, 1667–1676.  
643 <https://doi.org/10.1093/brain/123.8.1667>
- 644 Wickham, H., 2016. *ggplot2: Elegant Graphics for Data Analysis*. Springer-Verlag New York.
- 645 Wingerchuk, D.M., Banwell, B., Bennett, J.L., Cabre, P., Carroll, W., Chitnis, T., Seze, J. de, Fujihara, K.,  
646 Greenberg, B., Jacob, A., Jarius, S., Lana-Peixoto, M., Levy, M., Simon, J.H., Tenembaum, S.,  
647 Traboulsee, A.L., Waters, P., Wellik, K.E., Weinshenker, B.G., 2015. International consensus  
648 diagnostic criteria for neuromyelitis optica spectrum disorders. *Neurology* 85, 177–189.  
649 <https://doi.org/10.1212/WNL.0000000000001729>
- 650 Winkler, A.M., Webster, M.A., Brooks, J.C., Tracey, I., Smith, S.M., Nichols, T.E., 2016. Non-  
651 parametric combination and related permutation tests for neuroimaging. *Hum. Brain Mapp.*  
652 37, 1486–1511. <https://doi.org/10.1002/hbm.23115>
- 653 Zimmerman, R., Fleming, C., Lee, B., Saint-Louis, L., Deck, M., 1986. Periventricular hyperintensity as  
654 seen by magnetic resonance: prevalence and significance. *Am. J. Roentgenol.* 146, 443–450.  
655 <https://doi.org/10.2214/ajr.146.3.443>  
656
- 657



Figure 1. Example spectra and voxel placement from single subject

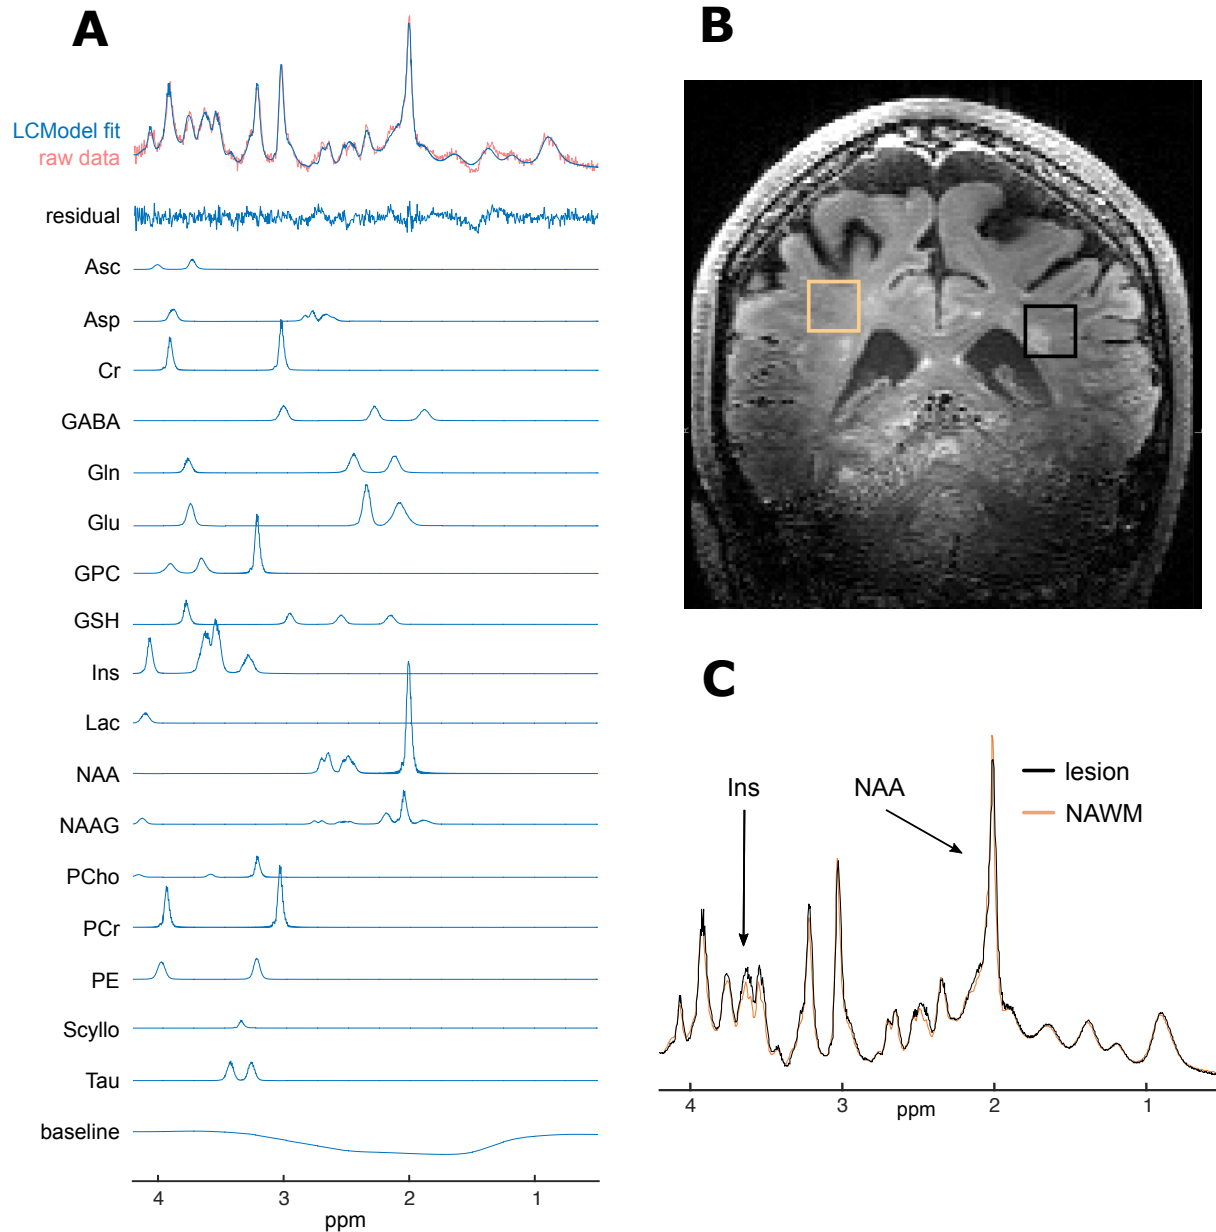

A. Raw spectrum data, LCMoDel fit (for average spectra and individual metabolites), residual-error and baseline for example participant (no. 20); B. Example voxel placement (lesion outlined in black and NAWM region outlined in orange) for same subject; C. Comparison of fitted (and baseline subtracted) lesion and NAWM spectra showing differences in ml and NAA peaks, again for same subject. ppm, parts per million; Ins, *myo*-inositol; NAA, N-aspartylaspartate.

Table 1. Demographics and clinical features

|                                          | MS          | NMO          | All         |
|------------------------------------------|-------------|--------------|-------------|
| Total n                                  | 11          | 4            | 15          |
| Age, yrs, median (min-max)               | 43 (28-60)  | 38 (24-40)   | 40 (24-60)  |
| Female, n (%)                            | 7 (63.6)    | 3 (75)       | 10 (66.7)   |
| Race                                     |             |              |             |
| Afro-caribbean (%)                       | 1 (9.1)**   | 3 (75)**     | 4 (26.7)    |
| Caucasian (%)                            | 10 (90.9)** | 0 (0)**      | 10 (66.7)   |
| Asian (%)                                | 0 (0)**     | 1 (25)**     | 1 (6.7)     |
| Disease duration, yrs, mean (sd)         | 6.8 (5.5)   | 8.9 (3.2)    | 7.3 (5.1)   |
| EDSS, median (min-max)                   | 2 (0-6)     | 3.75 (0-6)   | 2.5 (0-6)   |
| Minimum age of lesion, months, mean (sd) | 36 (33.3)*  | 86.6 (27.1)* | 49.5 (38.9) |
| On treatment, n (%)                      | 8 (72.7)    | 4 (100)      | 12 (80)     |

\* p<0.05 for MS vs NMO t-test comparison

\*\* p<0.05 for MS vs NMO chi-square comparison

Table 2. Estimated T2-water, LCmodel estimated FWHM and SNR

|               | <b>Lesion</b> | <b>Control</b> | <b>p</b> |
|---------------|---------------|----------------|----------|
| T2 water (ms) | 43.7 (2.8)    | 39.9 (2.6)     | 0.0001   |
| FWHM (ppm)    | 0.03 (0)      | 0.03 (0)       | 0.958    |
| S/N           | 25.7 (5.6)    | 28.3 (4)       | 0.097    |

FWHM, full width half maximum

S/N, signal to noise ratio

Figure 2. Metabolite profiles for multiple sclerosis and AQP4Ab positive neuromyelitis optica

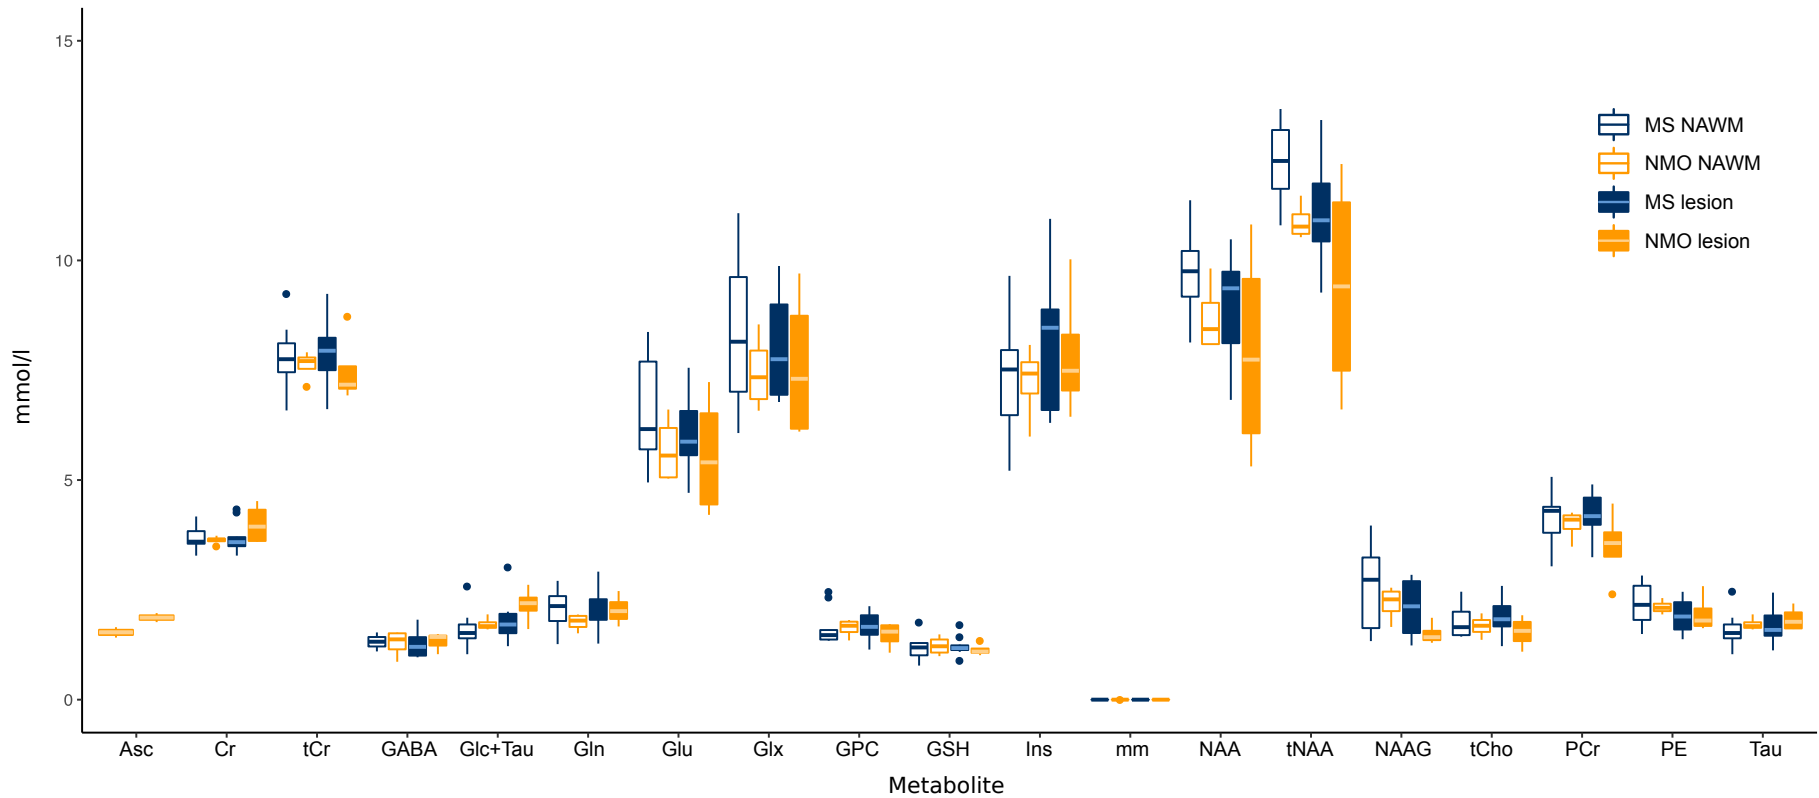

Box and whisker plots of metabolites for MS and AQP4Ab-NMOSD (NMO; min, lower-quartile, median, upper-quartile, max; outliers are >1.5 x interquartile range beyond lower or upper quartiles).

MS, multiple sclerosis; NMO, AQP4-antibody positive neuromyelitis optica; NAWM, normal appearing white matter

Table 3A. Multiple sclerosis metabolite profile (n=11)

| <i>Metabolite</i> | Concentration, mmol/L    |          |                        |          | CRLB                     |                        |
|-------------------|--------------------------|----------|------------------------|----------|--------------------------|------------------------|
|                   | <i>Lesion, mean (sd)</i> | <i>n</i> | <i>NAWM, mean (sd)</i> | <i>n</i> | <i>Lesion, mean (sd)</i> | <i>NAWM, mean (sd)</i> |
| Cr                | 3.67 (0.3)               | 11       | 3.69 (0.3)             | 11       | 8.73 (1.5)               | 8.55 (1.2)             |
| PCr               | 4.19 (0.5)               | 11       | 4.11 (0.5)             | 11       | 8 (1.3)                  | 8.09 (0.9)             |
| tCr               | 7.85 (0.7)               | 11       | 7.79 (0.7)             | 11       | 2.27 (0.4)               | 2.09 (0.3)             |
| GABA              | 1.27 (0.3)               | 6        | 1.32 (0.1)             | 6        | 16.5 (3.1)               | 16 (1.2)               |
| Glc+Tau           | 1.8 (0.5)                | 10       | 1.61 (0.4)             | 10       | 12.5 (2.6)               | 12.7 (2)               |
| Gln               | 2.1 (0.5)                | 10       | 2.06 (0.5)             | 7        | 12.4 (2.4)               | 13.29 (3.4)            |
| Glu               | 6 (0.8)                  | 11       | 6.61 (1.1)             | 11       | 4.27 (1)                 | 3.64 (0.6)             |
| Glx               | 8.04 (1.1)               | 11       | 8.34 (1.5)             | 11       | 4.45 (0.9)               | 4.36 (0.8)             |
| GPC               | 1.68 (0.3)               | 11       | 1.63 (0.4)             | 11       | 6 (1.7)                  | 6.36 (2.1)             |
| tCho              | 1.91 (0.4)               | 11       | 1.78 (0.3)             | 11       | 4.09 (0.8)               | 4.18 (0.8)             |
| GSH               | 1.22 (0.2)               | 11       | 1.18 (0.2)             | 11       | 10.55 (1.6)              | 10.91 (1.8)            |
| Ins               | 8.1 (1.4)                | 11       | 7.28 (1.2)             | 11       | 2.73 (0.6)               | 3.09 (0.3)             |
| NAA               | 8.94 (1.1)               | 11       | 9.69 (0.9)             | 11       | 2.55 (0.5)               | 2.36 (0.5)             |
| NAAG              | 2.09 (0.6)               | 11       | 2.55 (0.9)             | 11       | 8 (2.5)                  | 7 (2.9)                |
| tNAA              | 11.03 (1.1)              | 11       | 12.24 (0.9)            | 11       | 1.91 (0.3)               | 1.91 (0.3)             |
| PE                | 1.89 (0.4)               | 9        | 2.18 (0.4)             | 10       | 15.89 (2.7)              | 14.2 (2.1)             |
| Tau               | 1.66 (0.4)               | 11       | 1.6 (0.4)              | 10       | 12.82 (2.6)              | 12.6 (2)               |

NAWM, normal appearing white matter; CRLB, Cramér–Rao lower bound

Table 3B. AQP4-Ab positive neuromyelitis optica spectrum disorder metabolite profile (n=4)

| <i>Metabolite</i> | Concentration, mmol/L    |          |                        |          | CRLB                     |                        |
|-------------------|--------------------------|----------|------------------------|----------|--------------------------|------------------------|
|                   | <i>Lesion, mean (sd)</i> | <i>n</i> | <i>NAWM, mean (sd)</i> | <i>n</i> | <i>Lesion, mean (sd)</i> | <i>NAWM, mean (sd)</i> |
| Cr                | 4 (0.4)                  | 4        | 3.63 (0.1)             | 4        | 7.75 (0.8)               | 9 (1.4)                |
| PCr               | 3.5 (0.7)                | 4        | 3.98 (0.3)             | 4        | 9.5 (2.7)                | 8.75 (1.3)             |
| tCr               | 7.5 (0.7)                | 4        | 7.61 (0.3)             | 4        | 2 (0)                    | 2.25 (0.4)             |
| GABA              | 1.32 (0.2)               | 3        | 1.28 (0.3)             | 4        | 15.67 (2.6)              | 16.75 (2.6)            |
| Glc+Tau           | 2.15 (0.4)               | 4        | 1.72 (0.1)             | 4        | 11 (1.6)                 | 11 (2.9)               |
| Gln               | 2.04 (0.3)               | 4        | 1.76 (0.2)             | 4        | 11.5 (1.1)               | 14.25 (1.1)            |
| Glu               | 5.56 (1.2)               | 4        | 5.69 (0.7)             | 4        | 4 (0.7)                  | 4.5 (0.9)              |
| Glx               | 7.6 (1.5)                | 4        | 7.45 (0.8)             | 4        | 4 (0.7)                  | 4.5 (0.9)              |
| GPC               | 1.47 (0.3)               | 4        | 1.63 (0.2)             | 4        | 5.5 (2.1)                | 5.75 (1.8)             |
| tCho              | 1.54 (0.3)               | 4        | 1.67 (0.2)             | 4        | 4.5 (1.1)                | 4.5 (0.5)              |
| GSH               | 1.14 (0.1)               | 4        | 1.23 (0.2)             | 4        | 10.5 (0.9)               | 10.25 (1.6)            |
| Ins               | 7.86 (1.3)               | 4        | 7.23 (0.8)             | 4        | 2.75 (0.4)               | 3 (0)                  |
| NAA               | 7.9 (2.2)                | 4        | 8.69 (0.7)             | 4        | 2.5 (0.5)                | 2.5 (0.5)              |
| NAAG              | 1.5 (0.2)                | 4        | 2.19 (0.3)             | 4        | 9.25 (2.9)               | 7.5 (2.7)              |
| tNAA              | 9.4 (2.3)                | 4        | 10.89 (0.4)            | 4        | 2 (0)                    | 1.75 (0.4)             |
| PE                | 1.95 (0.4)               | 4        | 2.11 (0.1)             | 4        | 14.25 (1.5)              | 13.75 (2.7)            |
| Tau               | 1.84 (0.2)               | 4        | 1.72 (0.1)             | 4        | 11 (1.6)                 | 11 (2.9)               |
| Asc               | 1.87 (0.1)               | 2        | 1.53 (0.1)             | 2        | 12.5 (0.5)               | 16.5 (0.5)             |

NAWM, normal appearing white matter; CRLB, Cramér–Rao lower bound

Figure 3. Individual metabolite comparison boxplots

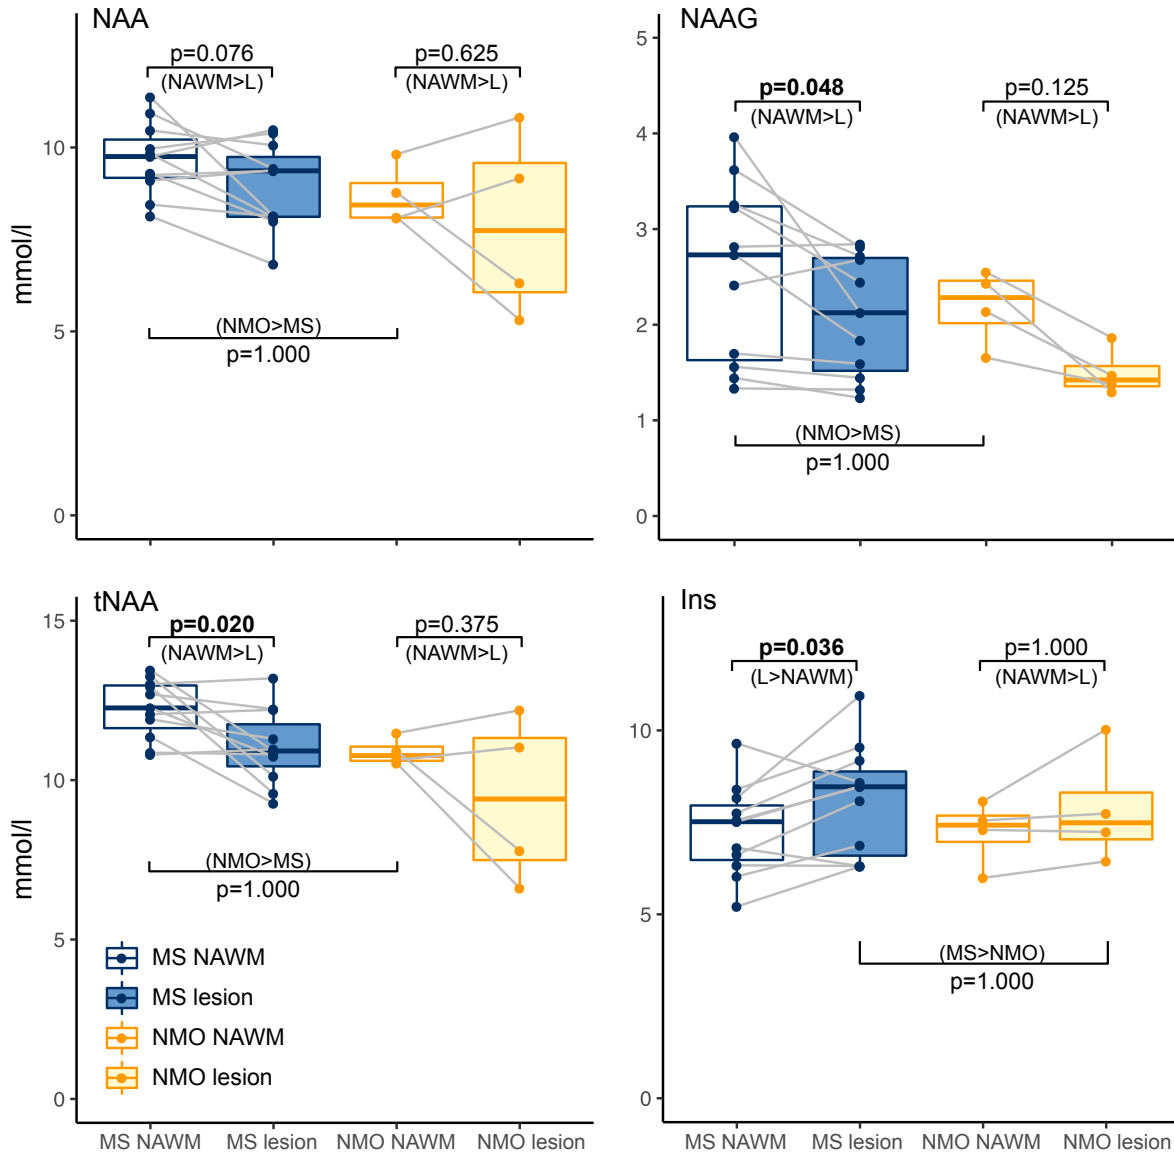

Boxplot representations of metabolite comparisons based on *a priori* hypotheses.

Hypotheses were unidirectional hence p-values denote significance of one-tailed t-tests. Direction of test denoted in brackets beneath p-value. MS, multiple sclerosis; NMO, neuromyelitis optica; NAWM, normal appearing white matter; L, lesion.

(Figure produced with R ggplot2 package; Wickham, 2016).

# MS

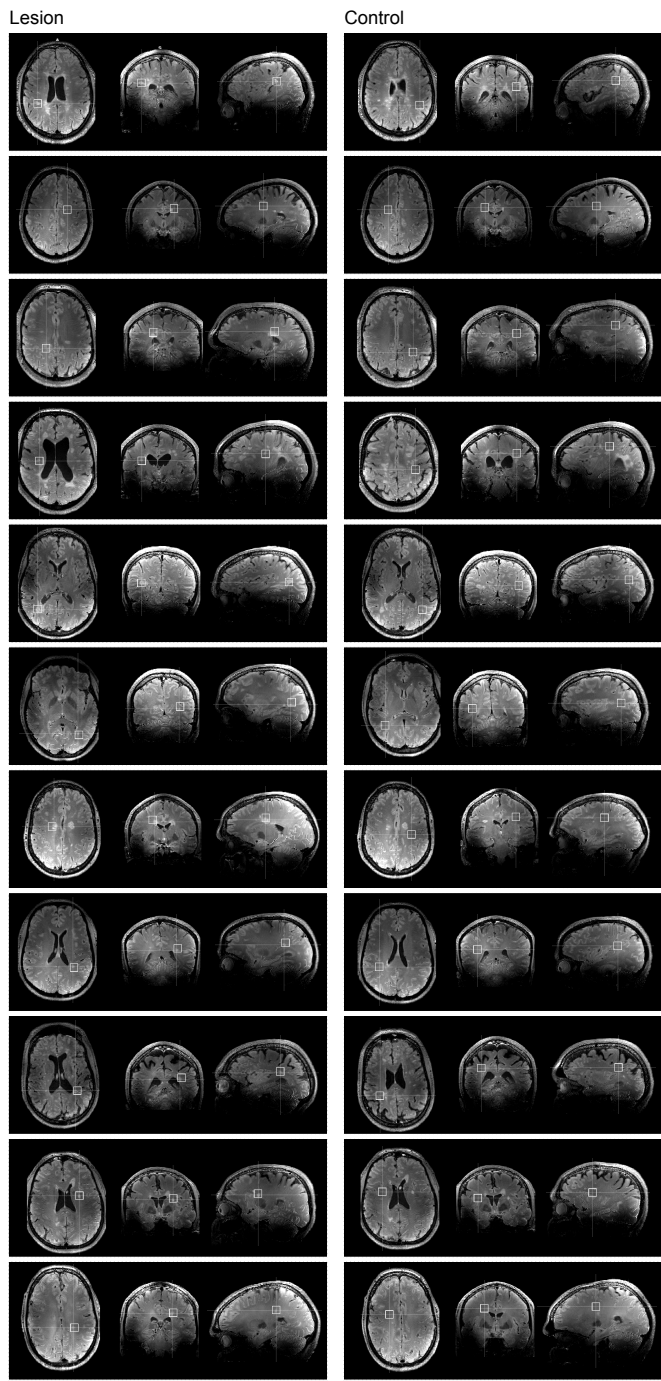

# NMO

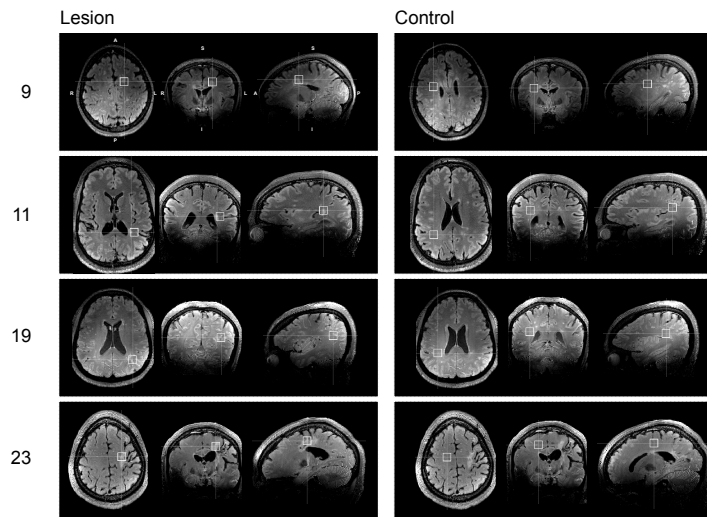

Supplemental Figure 1. Voxel placement



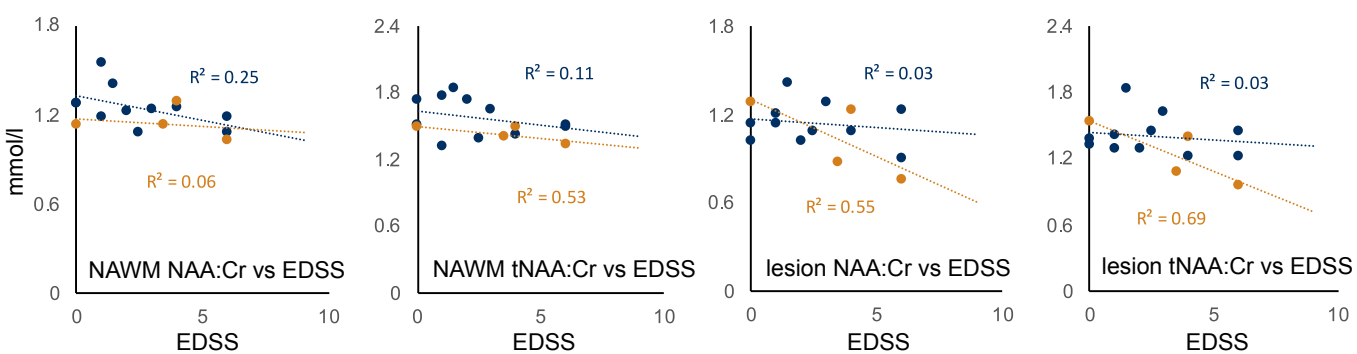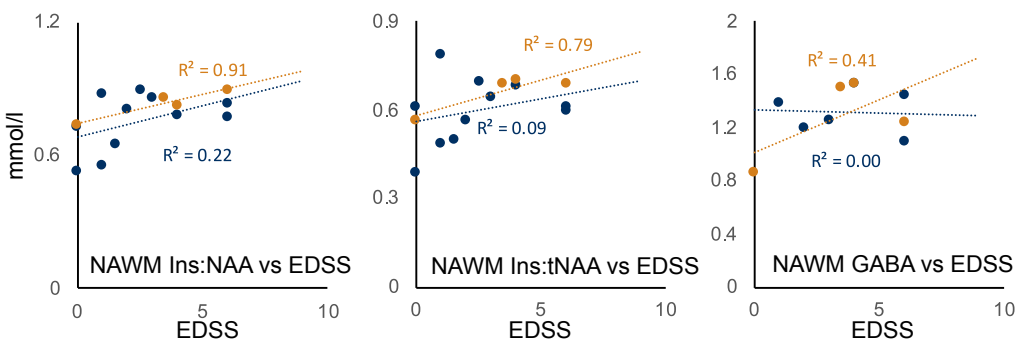

**Supplemental Figure 2. Correlations with clinical metrics**

Key:

-- Multiple sclerosis

-- AQP4Ab positive neuromyelitis optica spectrum disorder

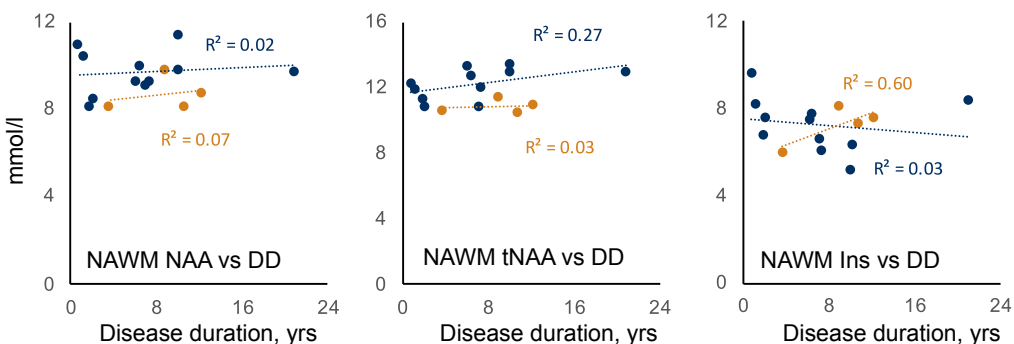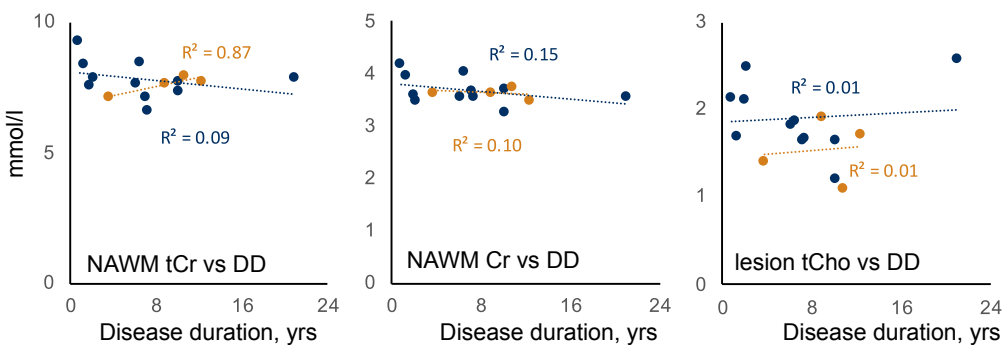

EDSS, Expanded Disability Status Scale; NAWM, normal appearing white matter
